# Supplementary material for: Radical anion and dianion salts of titanyl macrocycles with acceptor substituents or an extended π-system
Source: Royal Society of Chemistry journal article supplement (doi:10.1039/c6dt04896j), 2017-01-01
Supplement: c6dt04896j1.pdf [file c6dt04896j1.pdf]

Supporting information.

IR spectra

**Table S1.** IR-spectra (cm<sup>-1</sup> in KBr) of starting macrocycles and salts **1-3**.

| Components       | PPN <sup>+</sup> | O=Ti <sup>IV</sup> PcCl <sub>8</sub> | <b>1</b>                                      | Ti <sup>IV</sup> Cl <sub>2</sub> Nc | <b>2</b>                                      | O=Ti <sup>IV</sup> (AceTPrzPz) | <b>3</b>                                      |
|------------------|------------------|--------------------------------------|-----------------------------------------------|-------------------------------------|-----------------------------------------------|--------------------------------|-----------------------------------------------|
| Macroheterocycle |                  | 431w                                 | -                                             | 469m                                | -                                             | 449m                           | 442w                                          |
|                  |                  | 463w                                 | 462w                                          | 488w                                | -                                             | 464s                           | -                                             |
|                  |                  | 659m                                 | 656m                                          | 514w                                | -                                             | 559w                           | -                                             |
|                  |                  | 705m                                 | 691s                                          | 656w                                | -                                             | 630m                           | 620w                                          |
|                  |                  | 743m                                 | 745m*                                         | 690w                                | 692s*                                         | 660m                           | 658w                                          |
|                  |                  | 775m                                 | 773w                                          | 716m                                | 724s*                                         | 675m                           | -                                             |
|                  |                  | 829m                                 | 799m                                          | 733w                                | -                                             | 716m                           | 724s                                          |
|                  |                  | 890m                                 | 878m                                          | 752s                                | -                                             | 772s                           | 775m                                          |
|                  |                  | 946m (Ti=O)                          | 946m                                          | 798w                                | 794m                                          | 802w                           | 801w                                          |
|                  |                  | 1017w                                | (Ti=O)                                        | 863m                                | 843m                                          | 828m                           | 827m                                          |
|                  |                  | 1069s                                | -                                             | 886m                                | -                                             | -                              | 878m                                          |
|                  |                  | 1188w                                | 1080m                                         | 968m                                | -                                             | 927m(Ti=O)                     | 917w(Ti=O)                                    |
|                  |                  | 1260w                                | 1183w                                         | -                                   | 974w (Ti=O)                                   | 947m(Ti=O)                     | 927m(Ti=O)                                    |
|                  |                  | 1289w                                | 1263s*                                        | 1077s                               | 1074m                                         | 974w(Ti=O)                     | 941w(Ti=O)                                    |
|                  |                  | 1320m                                | -                                             | 1011m                               | -                                             | 1033s                          | 1048s                                         |
|                  |                  | 1375m                                | -                                             | 1062s                               | -                                             | 1099m                          | 1088w                                         |
|                  |                  | 1413s                                | 1383m                                         | 1125m                               | 1114s*                                        | 1134s                          | 1117m                                         |
|                  |                  | 1471m                                | 1408m                                         | 1153w                               | 1160w                                         | 1179m                          | 1177m                                         |
|                  |                  | -                                    | 1481m*                                        | -                                   | 1181m                                         | 1229s                          | 1211m                                         |
|                  |                  | 1603m                                | 1501m                                         | 1264m                               | 1267s*                                        | 1262m                          | 1266w*                                        |
|                  |                  | 2922m                                | 1623m                                         | -                                   | 1285s                                         | -                              | 1292m                                         |
|                  |                  | 3087m                                | -                                             | 1318m                               | -                                             | 1333m                          | -                                             |
|                  |                  |                                      | -                                             | 1338m                               | -                                             | 1369w                          | 1366m                                         |
|                  |                  |                                      |                                               | 1358m                               | -                                             | 1431s                          | 1435s*                                        |
|                  |                  |                                      |                                               | 1468w                               | 1456m*                                        | 1458m                          | 1455w*                                        |
|                  |                  |                                      |                                               | 1639m                               | 1630m                                         | 1514m                          | -                                             |
|                  |                  |                                      |                                               | 1747w                               | -                                             | 1547w                          | 1553s                                         |
|                  |                  |                                      |                                               |                                     | 1615s                                         | 1608w                          |                                               |
|                  |                  |                                      |                                               |                                     | 2851m                                         | -                              |                                               |
|                  |                  |                                      |                                               |                                     | 2921m                                         | -                              |                                               |
| PPN <sup>+</sup> |                  |                                      |                                               |                                     | 501s                                          |                                | 500m                                          |
|                  |                  | 500s                                 |                                               |                                     | 534s                                          |                                | 534m                                          |
|                  |                  | 531s                                 | 503m                                          |                                     | 547s                                          |                                | -                                             |
|                  |                  | 550s                                 | 534s                                          |                                     | 692s*                                         |                                | 692s*                                         |
|                  |                  | 694m                                 | 546w                                          |                                     | 724s*                                         |                                | 724s                                          |
|                  |                  | 724m                                 | 691s                                          |                                     | 748m*                                         |                                | -                                             |
|                  |                  | 746m                                 | 726s                                          |                                     | 995m                                          |                                | 755m*                                         |
|                  |                  | 754m                                 | 745m*                                         |                                     | 1023w*                                        |                                | 998m                                          |
|                  |                  | -                                    | 773w                                          |                                     | 1267s*                                        |                                | -                                             |
|                  |                  | 1024w                                | 998m                                          |                                     | 1435s                                         |                                | 1266w*                                        |
|                  |                  | 1250s                                | -                                             |                                     | 1480m                                         |                                | 1435s*                                        |
|                  |                  | 1439s                                | 1263s*                                        |                                     | -                                             |                                | 1481w                                         |
|                  |                  | 1483m                                | 1435s                                         |                                     | 1584w                                         |                                | -                                             |
|                  |                  | 1575w                                | 1481m*                                        |                                     |                                               |                                | -                                             |
|                  |                  | 1587m                                | 1563w                                         |                                     |                                               |                                | -                                             |
|                  |                  | 1586w                                |                                               |                                     |                                               |                                |                                               |
| Solvent          |                  |                                      |                                               |                                     | C <sub>6</sub> H <sub>4</sub> Cl <sub>2</sub> |                                | C <sub>6</sub> H <sub>4</sub> Cl <sub>2</sub> |
|                  |                  |                                      |                                               |                                     | 748m*                                         |                                | 658w                                          |
|                  |                  |                                      | C <sub>6</sub> H <sub>4</sub> Cl <sub>2</sub> |                                     | 1023w*                                        |                                | 755m*                                         |
|                  |                  |                                      | 656m                                          |                                     | 1114s*                                        |                                | 1117m                                         |
|                  |                  |                                      | 745m*                                         |                                     | 1456m                                         |                                | 1455w*                                        |
|                  |                  |                                      | 1115s                                         |                                     |                                               |                                |                                               |
|                  |                  |                                      | 1455m                                         |                                     |                                               |                                | C <sub>6</sub> H <sub>5</sub> CN              |
|                  |                  |                                      |                                               |                                     |                                               |                                | 692s*                                         |
|                  |                  |                                      |                                               |                                     |                                               |                                | 755m*                                         |
|                  |                  |                                      |                                               |                                     |                                               |                                |                                               |

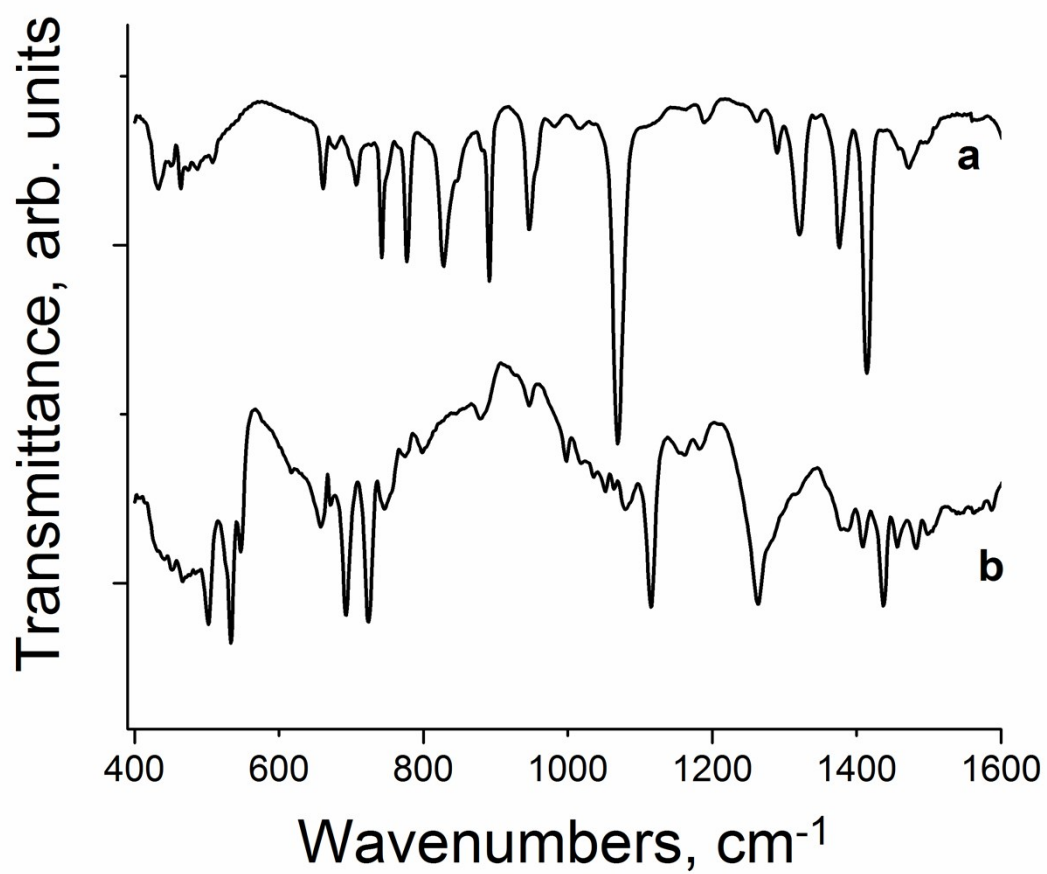

**Figure S1.** IR spectra of starting neutral O=Ti<sup>IV</sup>(PcCl<sub>8</sub><sup>2-</sup>) (a) and salt (PPN<sup>+</sup>)<sub>2</sub>{O=Ti<sup>IV</sup>(PcCl<sub>8</sub><sup>4-</sup>)}<sup>2-</sup> (b) in KBr pellet prepared in anaerobic condition.

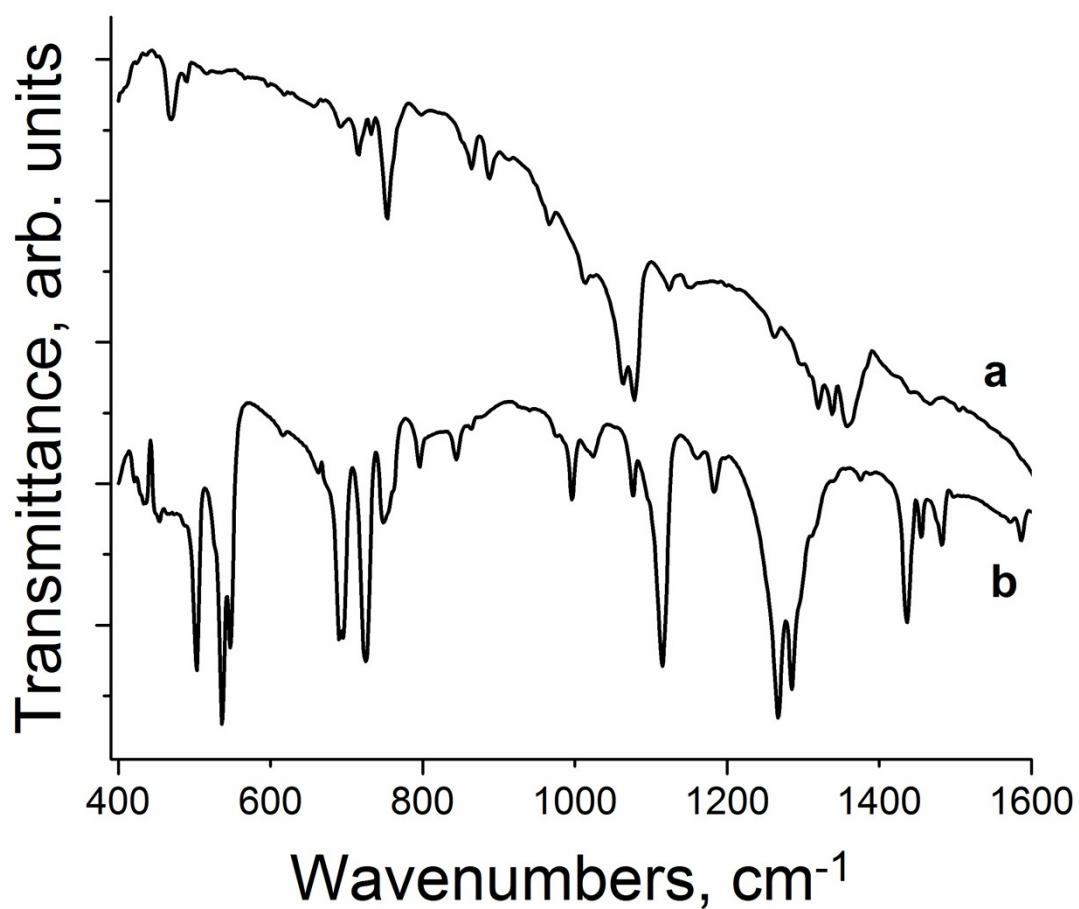

**Figure S2.** IR spectra of starting neutral  $\text{Ti}^{\text{IV}}\text{Cl}_2\text{Nc}^{2-}$  (a) and salt  $(\text{PPN}^+)\{\text{O}=\text{Ti}^{\text{IV}}(\text{Nc}^{\bullet 3-})\}^{\bullet\bullet}\cdot 2\text{C}_6\text{H}_4\text{Cl}_2$  (2) (b) in KBr pellet prepared in anaerobic condition.

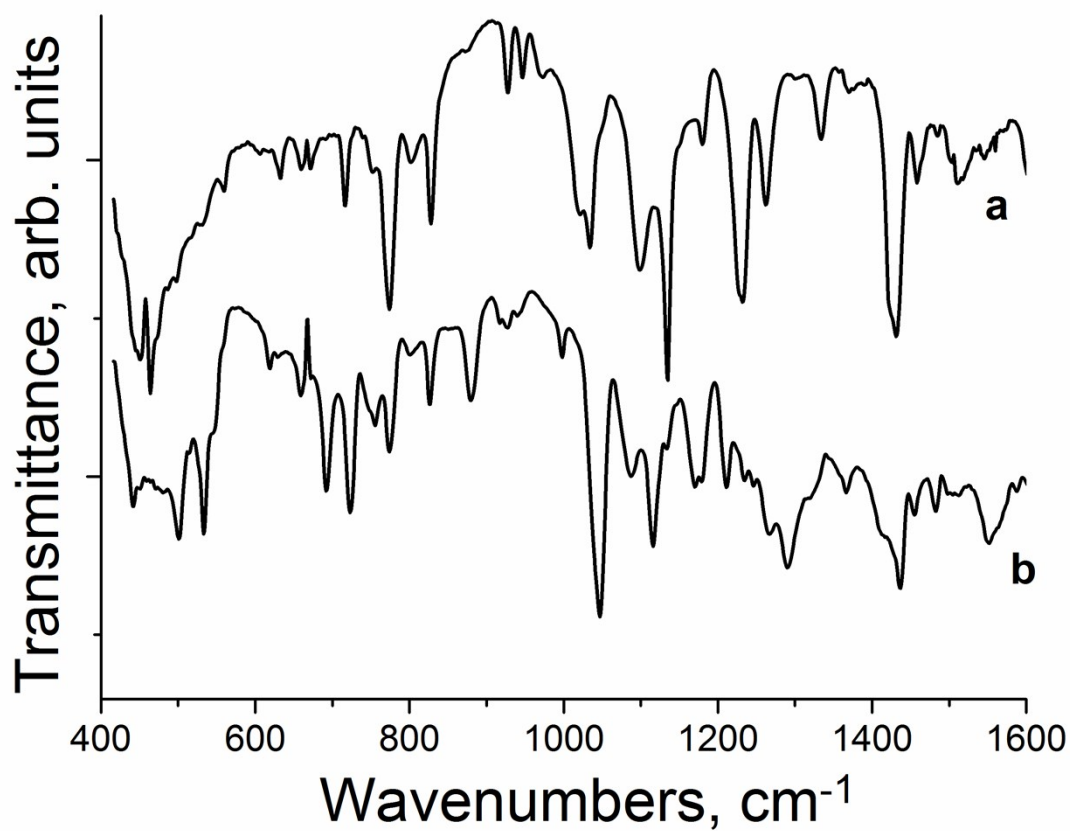

**Figure S3.** IR spectra of starting neutral  $\text{O}=\text{Ti}^{\text{IV}}(\text{AceTPrzPz}^{2-})$  (a) and salt  $(\text{PPN}^+)_2\{\text{O}=\text{Ti}^{\text{IV}}(\text{AceTPrzPz}^{4-})\}^{2-}\cdot 1.3\text{C}_6\text{H}_4\text{Cl}_2\cdot 0.8\text{C}_6\text{H}_4\text{Cl}_2$  (**3**) (b) in KBr pellet prepared in anaerobic condition.
